# Supplementary material for: Coralline-like CoP3@Cu as an efficient electrocatalyst for the hydrogen evolution reaction in acidic and alkaline solutions
Source: Royal Society of Chemistry journal article supplement (doi:10.1039/d0nj03751f), 2020-01-01
Supplement: d0nj03751f1.pdf [file d0nj03751f1.pdf]

## Supporting Information

### **Coralline-like CoP<sub>3</sub>@Cu as an efficient electrocatalyst for hydrogen evolution reaction in acidic and alkaline solutions**

Mengyu Hou<sup>a,1</sup>, Ying Xu<sup>a,1</sup>, Xi Li<sup>a,\*</sup>, Yongzhi Dong<sup>a</sup>, Fengke Sun<sup>a</sup>, Dan Tang<sup>a</sup>, Minkun Cai<sup>a</sup>,

Chenglong Jin<sup>a</sup>, Yulin Dong<sup>a</sup>, Deyu Qu<sup>a</sup>, Zhizhong Xie<sup>a</sup>, Yawei Lin<sup>a</sup>, Chaocan Zhang<sup>b,\*</sup>

<sup>a</sup>*School of Chemistry, Chemical Engineering and Life Science, Wuhan University of Technology,*

*Wuhan 430070, PR China*

<sup>b</sup>*School of Materials Science and Engineering, Wuhan University of Technology, Wuhan 430070,*

*PR China*

<sup>1</sup>*These authors contributed equally to this work.*

*\*Corresponding authors*

*E-mail: chemlixli@whut.edu.cn (Xi Li); polymers@whut.edu.cn (Chaocan Zhang).*

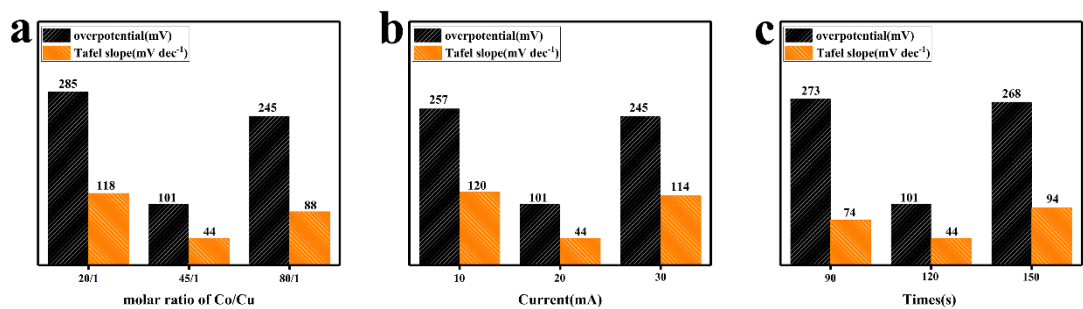

**Figure S1.** The optimized plot of overpotential ( $j=10 \text{ mA cm}^{-2}$ ) and Tafel slope and deposition conditions of  $\text{CoP}_3\text{@Cu/Cu}$ : (a) molar ratio of Co/Cu, (b) deposition current, (c) deposition time.

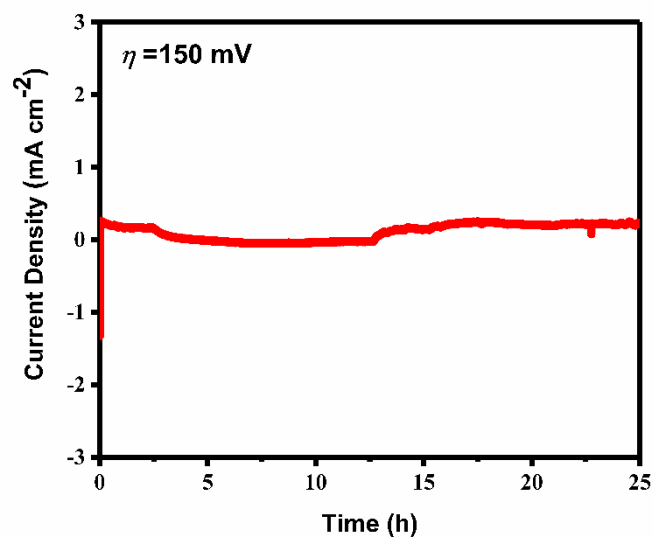

**Figure S2.** The  $i$ - $t$  curve of Cu plate in  $0.5 \text{ M H}_2\text{SO}_4$ .

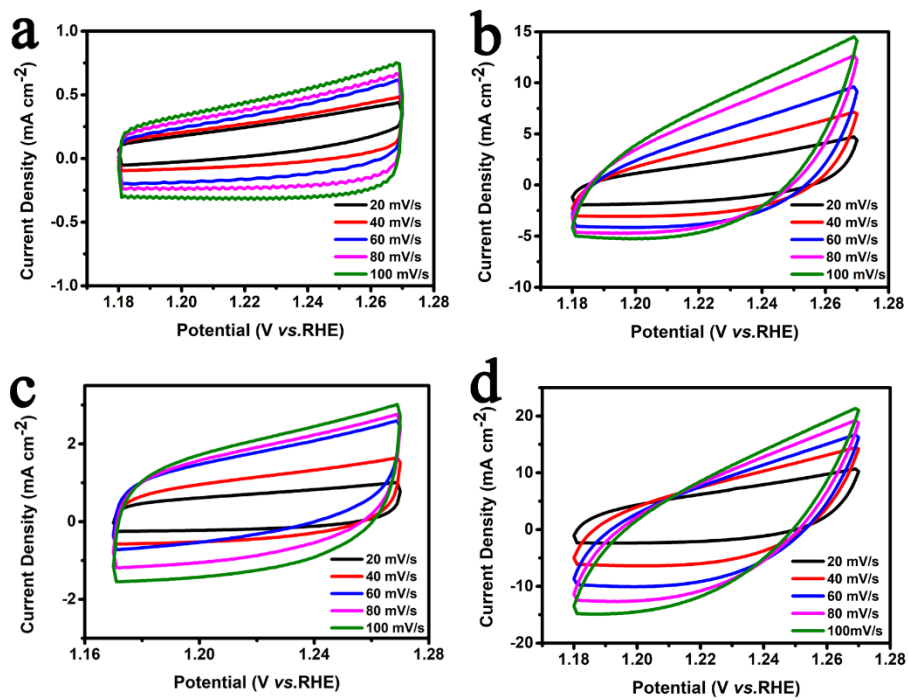

**Fig. S3** The CV curves of (a) Cu-P, (b) Cu-D, (c)  $\text{CoP}_3/\text{Cu}$ , and (d)  $\text{CoP}_3@\text{Cu}/\text{Cu}$  in 1 M KOH.
